# Supplementary material for: The gene ENHANCER OF PINOID controls cotyledon development in the Arabidopsis embryo
Source: Oxford University Press journal article supplement (doi:10.1242/dev.01969), 2005-08-17
Supplement: dev01969supp_tables.pdf [file dev01969supp_tables.pdf]

**Table S1. Generation and assessment of *pid* and *enp* genotype combinations**

| Genotype                                                                                                          | Test/procedure applied to assess the genotype                                                                                                                                                                                                                                                                                               |
|-------------------------------------------------------------------------------------------------------------------|---------------------------------------------------------------------------------------------------------------------------------------------------------------------------------------------------------------------------------------------------------------------------------------------------------------------------------------------|
| + <sup>1</sup> +/+ + ( <i>Ler</i> )                                                                               | Progeny (12 plants) of the <i>Ler</i> line used in this study was crossed with <i>pid-2/15</i> alleles. The resulting F1 plants did not segregate <i>laterne</i> seeds (however, see Table S3).                                                                                                                                             |
| + <i>enp</i> /+ +                                                                                                 | Plants with this genotype were produced by cross of <i>Ler</i> with <i>enp/enp</i> plants. These F1 plants have rare floral defects.                                                                                                                                                                                                        |
| + <i>enp</i> /+ <i>enp</i>                                                                                        | Isolated line from the original <i>laterne</i> segregating line. All <i>pid</i> alleles used in this study were crossed with the progeny (15 plants) of this <i>enp</i> homozygote. From the resulting F1 97 plants were scored for <i>laterne</i> segregation. All produced <i>laterne</i> seeds.                                          |
| + <i>enp</i> / <i>pid-15 enp</i>                                                                                  | The genotype of this line was confirmed by crossing with <i>pid-15</i> homozygotes. This led to 50% F1 plants with a <i>pid</i> phenotype (genotype: <i>pid-15</i> +/ <i>pid-15 enp</i> ) and 50% almost wild-type plants ( <i>pid-15</i> +/+ <i>enp</i> ). The <i>pid-15 enp</i> /+ <i>enp</i> plants produced ~ 25% <i>laterne</i> seeds. |
| <i>pid-x</i> <sup>2</sup> <i>enp</i> / <i>pid-x enp</i>                                                           | Homozygous double mutants, which are produced by selfing of <i>pid-x</i> +/+ <i>enp</i> or <i>pid-x enp</i> /+ <i>enp</i> lines. Seeds with the typical <i>laterne</i> appearance make 6,25% and 25% of the progeny of the former and the latter respectively.                                                                              |
| <i>pid-2/15 enp</i> / <i>pid-2/15</i> +                                                                           | Produced by crossing of <i>pid-2/15 enp</i> /+ <i>enp</i> with <i>pid-2/15</i> homozygotes. This results in ~1:1 <i>pid</i> to wt <sup>3</sup> plants. All <i>pid</i> plants are either sterile or segregate rarely <i>laterne</i> (at least 20% reduction; 30 plants analysed).                                                            |
| <i>pid-x</i> +/+ <i>enp</i>                                                                                       | Produced by crossing <i>pid-x</i> homozygotes with <i>enp</i> homozygotes. All F1 plants segregate <i>laterne</i> .                                                                                                                                                                                                                         |
| <i>pid-x</i> +/ <i>pid-x</i> +                                                                                    | Selfing of <i>pid</i> homozygous lines produces <i>pid</i> -plants with allele-specific phenotypic strength.                                                                                                                                                                                                                                |
| <i>pid-x</i> +/+ +                                                                                                | Produced by crossing <i>pid-x</i> with wild-type plants. F1 plants segregate <i>pid</i> -phenotypes and wild types.                                                                                                                                                                                                                         |
| + <sup>1</sup> , wild-type allele; x <sup>2</sup> , any <i>pid</i> allele; wt <sup>3</sup> , wild-type phenotype. |                                                                                                                                                                                                                                                                                                                                             |

**Table S2. Penetrance of *laterne* seed phenotype**

| Line    | Genotype                | Genetic background | % <i>laterne</i> expected | % <i>laterne</i> seeds observed (mutant/total) |
|---------|-------------------------|--------------------|---------------------------|------------------------------------------------|
| R1      | <i>pid-15 enp/+ enp</i> | <i>Ler</i>         | 25                        | 26.2 (28/107)                                  |
| R2      | <i>pid-15 enp/+ enp</i> | <i>Ler</i>         | 25                        | 28 (30/107)                                    |
| R120802 | <i>pid-15 enp/+ enp</i> | <i>Ler</i>         | 25                        | 21.4 (135/631)                                 |
| III2E4a | <i>pid-15 enp/+ enp</i> | <i>Ler</i>         | 25                        | 23.3 (24/103)                                  |
| III2A82 | <i>pid-15 enp/+ enp</i> | <i>Ler</i>         | 25                        | 22.2 (36/162)                                  |
|         |                         |                    |                           | Mean: 24.22±2.79                               |
| R55A    | <i>pid-15 +/- enp</i>   | <i>Ler</i>         | 6.25                      | 6.7 (96/1443)                                  |
| R99A    | <i>pid-15 +/- enp</i>   | <i>Ler</i>         | 6.25                      | 8.5 (72/847)                                   |
|         |                         |                    |                           | Mean: 7.6±1.27                                 |
| 211x8a  | <i>pid-8 +/+ enp</i>    | WS-2/ <i>Ler</i>   | 6.25                      | 5.3 (42/794)                                   |
| 211x8b  | <i>pid-8 +/+ enp</i>    | WS-2/ <i>Ler</i>   | 6.25                      | 5.4 (25/461)                                   |
| 211x8c  | <i>pid-8 +/+ enp</i>    | WS-2/ <i>Ler</i>   | 6.25                      | 5.3 (23/430)                                   |
| 212x8a  | <i>pid-8 +/+ enp</i>    | WS-2/ <i>Ler</i>   | 6.25                      | 5.2 (19/366)                                   |
| 212x8b  | <i>pid-8 +/+ enp</i>    | WS-2/ <i>Ler</i>   | 6.25                      | 6.0 (18/300)                                   |
| 212x8c  | <i>pid-8 +/+ enp</i>    | WS-2/ <i>Ler</i>   | 6.25                      | 7.4 (40/542)                                   |
|         |                         |                    |                           | Mean: 5.77±0.85                                |
| 211x92a | <i>pid-9 +/+ enp</i>    | Col/ <i>Ler</i>    | 6.25                      | 7.2 (35/484)                                   |
| 211x92b | <i>pid-9 +/+ enp</i>    | Col/ <i>Ler</i>    | 6.25                      | 7.2 (47/656)                                   |
| 211x92c | <i>pid-9 +/+ enp</i>    | Col/ <i>Ler</i>    | 6.25                      | 7.7 (38/491)                                   |
| 212x91a | <i>pid-9 +/+ enp</i>    | Col/ <i>Ler</i>    | 6.25                      | 7.3 (29/400)                                   |
| 212x91e | <i>pid-9 +/+ enp</i>    | Col/ <i>Ler</i>    | 6.25                      | 6.7 (23/343)                                   |
| 212x91f | <i>pid-9 +/+ enp</i>    | Col/ <i>Ler</i>    | 6.25                      | 6.7 (31/460)                                   |
|         |                         |                    |                           | Mean: 7.13±0.38                                |
| latAx21 | <i>pid-2 +/+ enp</i>    | <i>Ler</i>         | 6.25                      | 5.1 (7/137)                                    |
| latAx22 | <i>pid-2 +/+ enp</i>    | <i>Ler</i>         | 6.25                      | 6.5 (21/322)                                   |
| latAx23 | <i>pid-2 +/+ enp</i>    | <i>Ler</i>         | 6.25                      | 6.8 (13/190)                                   |
| latAx24 | <i>pid-2 +/+ enp</i>    | <i>Ler</i>         | 6.25                      | 6.4 (21/326)                                   |
| latAx25 | <i>pid-2 +/+ enp</i>    | <i>Ler</i>         | 6.25                      | 5.0 (8/159)                                    |
|         |                         |                    |                           | Mean: 5.96±0.84                                |

**Table S3. Frequency of ‘leaky’ *laterne* seeds in different backgrounds**

| Number of<br>lines scored | Genotype                       | Genetic<br>background | <i>laterne</i><br>seed/total<br>number of seeds |
|---------------------------|--------------------------------|-----------------------|-------------------------------------------------|
| 6                         | <i>pid-15</i> +/+ +            | Ler                   | 2/2423                                          |
| 2                         | <i>pid-2</i> +/+ +             | Ler                   | 0/440                                           |
| 15                        | <i>pid-2</i> +/ <i>pid-2</i> + | Ler                   | 1/700                                           |
| 3                         | <i>pid-8</i> +/ <i>pid-8</i> + | Ws                    | 5/1500                                          |
| 5                         | <i>pid-9</i> +/+ +             | Col                   | 4/3200                                          |
| 7                         | <i>pid-15</i> +/+ +            | Ler/Nd                | 3/5200                                          |
| 7                         | <i>pid-15</i> +/+ +            | Ler/Col               | 23/5700                                         |

**Table S4. Auxin transport measurements in wild-type (*Ler*), *pinoid* and *laterne* plants**

| Genotype                                                 | Number of analysed plants | % $^{14}\text{C}$ -IAA* |
|----------------------------------------------------------|---------------------------|-------------------------|
| Wild type (++/++)                                        | $n=10$                    | 100 $\pm$ 46%           |
| <i>pinoid</i> total ( <i>pid-15</i> +/ <i>pid-15</i> +)  | $n=48$                    | 35 $\pm$ 31%            |
| <i>pinoid</i> with flowers                               | $n=25$                    | 42 $\pm$ 32%            |
| <i>pinoid</i> without flowers                            | $n=23$                    | 28 $\pm$ 29%            |
| <i>laterne</i> ( <i>pid-15 enp</i> / <i>pid-15 enp</i> ) | $n=50$                    | 34 $\pm$ 33%            |

\*Average transport in wild type as reference. Relative concentrations of  $^{14}\text{C}$ -IAA transported to the basal 4 mm of 2.5 cm stem fragments within 24 hours.
